# Supplementary material for: Niche partitioning of bobcat and Canada lynx near their distribution contact zone
Source: Atypon-hosted journal article supplement (doi:10.1139/facets-2023-0023), 2024-01-01
Supplement: facets-2020-0023suppla.csv [file facets-2020-0023suppla.csv]

	DATE	Code	d13C	d15N	C.N	Species	WMZ	SEX	AGE.CLASS	ACTUAL.AGE	Mass..g.	Dominant	Tissue
1	18-Feb-18	L17-029	-26.44	5.3	3.35	Lynx	10	F	A	7.5	9752.4	Mixed	Liver
2	10-Jan-18	B17-152	-25.37	8.06	3.6	Bobcat	10	F	A	11	7342.65	Mixed	Liver
3	10-Jan-18	B17-152	-27.4	6.21	4.21	Bobcat	10	F	A	11	7342.65	Mixed	Muscle
4	13-Dec-17	B17-149	-27.14	6.27	3.18	Bobcat	10	M	J	N/A	5868.45	Mixed	Muscle
5	18-Feb-18	L17-029	-27.05	4.21	3.31	Lynx	10	F	A	7.5	9752.4	Mixed	Muscle
6	13-Dec-17	B17-149	-26.46	6.57	3.43	Bobcat	10	M	J	N/A	5868.45	Mixed	Liver
7	30-Dec-17	B17-151	-25.59	6.91	3.39	Bobcat	10	M	J	N/A	6435.45	Mixed	Liver
8	Dec 2nd, 2016	L16-013	-26.97476065	6.65	4.05	Lynx	10	M			10432.8	Mixed	Liver
9	Dec 2nd, 2016	L16-013	-26.92	5.7	3.26	Lynx	10	M			10432.8	Mixed	Muscle
10	30-Dec-17	B17-151	-26.99	6.14	3.28	Bobcat	10	M	J	N/A	6435.45	Mixed	Muscle
11	15-Jan-17	B16-166	-26.37	5.55	3.17	Bobcat	11	F	A	1	5896.8	Mixed	Muscle
12	20-Dec-16	B16-155	-25.97	6.83	3.21	Bobcat	11	M	A	10	12247.2	Mixed	Muscle
13	4-Jan-18	L17-017	-26.48	5.59	3.29	Lynx	11	M	A	1.5	9610.65	Mixed	Liver
14	12-Dec-17	B17-263	-23.06	7.95	3.31	Bobcat	11	M	A	8	10432.8	Mixed	Liver
15	4-Jan-18	L17-017	-26.45	5.43	3.34	Lynx	11	M	A	1.5	9610.65	Mixed	Muscle
16	20-Dec-16	B16-155	-25.87306671	8.13	4.26	Bobcat	11	M	A	10	12247.2	Mixed	Liver
17	Feb 26th, 2017	L16-034	-26.73611575	4.25	4.87	Lynx	11	F			9979.2	Mixed	Liver
18	12-Dec-17	B17-263	-24.66	6.5	3.28	Bobcat	11	M	A	8	10432.8	Mixed	Muscle
19	Feb 26th, 2017	L16-034	-27.25	3.68	3.36	Lynx	11	F			9979.2	Mixed	Muscle
20	15-Jan-17	B16-166	-26.24139214	6.43	4.22	Bobcat	11	F	A	1	5896.8	Mixed	Liver
21	12-Dec-16	B16-075	-25.33121356	7.43	5.41	Bobcat	12	F	A	3	7711.2	Bobcat	Liver
22	8-Feb-17	B16-127	-22.09598638	7.88	6.39	Bobcat	12	M	A	1	10432.8	Bobcat	Liver
23	1-Dec-17	B17-047	-27.52	4.83	3.29	Bobcat	12	F	A	1	7711.2	Bobcat	Muscle
24	12-Dec-16	B16-075	-25.41	5.93	3.19	Bobcat	12	F	A	3	7711.2	Bobcat	Muscle
25	3-Feb-17	B16-126	-22.82757832	9.61	4.94	Bobcat	12	F	J	0	4989.6	Bobcat	Liver
26	3-Feb-17	B16-126	-24.97	6.97	3.11	Bobcat	12	F	J	0	4989.6	Bobcat	Muscle
27	1-Dec-17	B17-047	-26.58	5.74	3.22	Bobcat	12	F	A	1	7711.2	Bobcat	Liver
28	8-Feb-17	B16-127	-25.11	6.87	3.29	Bobcat	12	M	A	1	10432.8	Bobcat	Muscle
29	19-Feb-18	B17-206	-25.66	4.54	3.41	Bobcat	13	M	J	N/A	5017.95	Mixed	Liver
30	23-Dec-16	B16-073	-26.64	5.52	3.24	Bobcat	13	F	A	7	6350.4	Mixed	Muscle
31	3-Feb-18	B17-212	-25.74	5.56	3.46	Bobcat	13	F	A	2	7342.65	Mixed	Liver
32	27-Nov-17	B17-048	-26.07	5.04	3.27	Bobcat	13	M	A	2	11793.6	Mixed	Muscle
33	Jan 16th, 2017	L16-018	-27.28858989	5.99	3.95	Lynx	13	M			5896.8	Mixed	Liver
34	16-Dec-16	B16-072	-27.5	5.79	3.25	Bobcat	13	M	A	0	7257.6	Mixed	Muscle
35	21-Dec-16	B16-077	-26.87	5.51	3.23	Bobcat	13	F	J	0	5443.2	Mixed	Muscle
36	19-Feb-18	B17-206	-26.86	4.54	3.22	Bobcat	13	M	J	N/A	5017.95	Mixed	Muscle
37	Jan 16th, 2017	L16-018	-27.35	4.81	3.24	Lynx	13	M			5896.8	Mixed	Muscle
38	23-Dec-16	B16-073	-26.18750399	6.12	4.53	Bobcat	13	F	A	7	6350.4	Mixed	Liver
39	Jan 16th, 2017	L16-020	-26.55759457	5.08	4.86	Lynx	13	F			10432.8	Mixed	Liver
40	27-Nov-17	B17-048	-26.02	6.13	3.26	Bobcat	13	M	A	2	11793.6	Mixed	Liver
41	Jan 16th, 2017	L16-020	-26.9	4.39	3.23	Lynx	13	F			10432.8	Mixed	Muscle
42	21-Dec-16	B16-077	-25.88957086	5.91	4.17	Bobcat	13	F	J	0	5443.2	Mixed	Liver
43	15-Feb-18	L17-027	-27.37	3.8	3.34	Lynx	13	M	A	1.5	10120.95	Mixed	Muscle
44	23-Feb-18	L17-032	-26.41	5.42	3.24	Lynx	13	F	A	2.5	7966.35	Mixed	Liver
45	23-Feb-18	L17-032	-26.78	4.79	3.29	Lynx	13	F	A	2.5	7966.35	Mixed	Muscle
46	3-Feb-18	B17-212	-26.84	4.53	3.17	Bobcat	13	F	A	2	7342.65	Mixed	Muscle
47	15-Feb-18	L17-027	-26.88	4.49	3.39	Lynx	13	M	A	1.5	10120.95	Mixed	Liver
48	16-Dec-16	B16-072	-27.16098788	5.92	4.12	Bobcat	13	M	A	0	7257.6	Mixed	Liver
49	UNK	B17-191	-26.36	5.61	3.24	Bobcat	14	M	A	2	10376.1	Mixed	Muscle
50	2-Dec-16	B16-013	-24.40495235	6.57	4.65	Bobcat	14	M	A	4	10432.8	Mixed	Liver
51	2-Dec-16	B16-013	-24.11	6.38	3.12	Bobcat	14	M	A	4	10432.8	Mixed	Muscle
52	UNK	B17-191	-25.95	5.98	3.42	Bobcat	14	M	A	2	10376.1	Mixed	Liver
53	22-Jan-18	B17-220	-25.74	6.31	3.33	Bobcat	14	F	J	N/A	2778.3	Mixed	Liver
54	11-Jan-18	B17-197	-26.82	4.24	3.24	Bobcat	14	F	A	2	6889.05	Mixed	Muscle
55	UKN	L16-023	-27.18628612	5.48	4.2	Lynx	14	M			10432.8	Mixed	Liver
56	UKN	L16-023	-26.9	5.1	3.18	Lynx	14	M			10432.8	Mixed	Muscle
57	11-Jan-18	B17-197	-25.8	5.9	3.34	Bobcat	14	F	A	2	6889.05	Mixed	Liver
58	19-Dec-16	B16-099	-22.68757112	7.97	5.51	Bobcat	14	F	A	14	10432.8	Mixed	Liver
59	19-Dec-16	B16-099	-24.28	7.86	3.92	Bobcat	14	F	A	14	10432.8	Mixed	Muscle
60	22-Jan-18	B17-220	-28.08	4.23	3.58	Bobcat	14	F	J	N/A	2778.3	Mixed	Muscle
61	4-Jan-17	B16-023	-27.14	5.48	3.22	Bobcat	15	M	J	0	7257.6	Bobcat	Muscle
62	27-Jan-18	B17-116	-25.4	5.64	3.34	Bobcat	15	M	A	1	8306.55	Bobcat	Liver
63	28-Dec-17	B17-187	-27.33	4.98	3.22	Bobcat	15	F	A	5	9128.7	Bobcat	Muscle
64	20-Jan-17	B16-101	-25.45955281	6.16	4.55	Bobcat	15	F	A	2	9072	Bobcat	Liver
65	17-Feb-18	B17-160	-25.88	6.19	3.39	Bobcat	15	F	A	1	7342.65	Bobcat	Muscle
66	27-Jan-18	B17-116	-25.52	5.87	3.21	Bobcat	15	M	A	1	8306.55	Bobcat	Muscle
67	4-Jan-17	B16-023	-27.12521968	5.29	4.06	Bobcat	15	M	J	0	7257.6	Bobcat	Liver
68	27-Dec-17	B17-174	-26.82	6.13	3.58	Bobcat	15	M	J	N/A	6010.2	Bobcat	Liver
69	27-Dec-17	B17-174	-27.88	5.46	3.52	Bobcat	15	M	J	N/A	6010.2	Bobcat	Muscle
70	20-Jan-17	B16-101	-26.66	5.42	3.33	Bobcat	15	F	A	2	9072	Bobcat	Muscle
71	28-Dec-17	B17-187	-26.85	6.19	3.25	Bobcat	15	F	A	5	9128.7	Bobcat	Liver
72	11-Dec-16	B16-011	-26.47427754	6.21	4.02	Bobcat	15	M	A	6	11340	Bobcat	Liver
73	17-Feb-18	B17-160	-25.08	6.96	3.23	Bobcat	15	F	A	1	7342.65	Bobcat	Liver
74	11-Dec-16	B16-011	-25.7	5.47	3.11	Bobcat	15	M	A	6	11340	Bobcat	Muscle
75	1-Dec-16	B16-007	-25.04901925	7.28	4.67	Bobcat	16	M	A	12	9979.2	Mixed	Liver
76	18-Jan	B17-067	-26.55	5.48	3.38	Bobcat	16	F	A	9	6350.4	Mixed	Liver
77	31-Jan-18	B17-129	-23.74	7.19	3.09	Bobcat	16	M	A	1	10262.7	Mixed	Muscle
78	25-Feb-18	L17-033	-27.24	3.94	3.24	Lynx	16	F	A	5.5	9525.6	Mixed	Muscle
79	10-Dec-16	B16-005	-23.78873646	7.28	3.89	Bobcat	16	M	J	0	4082.4	Mixed	Liver
80	25-Feb-18	L17-033	-26.97	4.97	3.43	Lynx	16	F	A	5.5	9525.6	Mixed	Liver
81	24-Dec-16	B16-057	-26.21896854	5.51	4.48	Bobcat	16	F	J	0	6350.4	Mixed	Liver
82	1-Dec-16	B16-007	-25.37	6.45	3.3	Bobcat	16	M	A	12	9979.2	Mixed	Muscle
83	Jan 23rd, 2017	L16-033	-26.67	5.29	3.29	Lynx	16	M			11340	Mixed	Muscle
84	18-Jan	B17-067	-26.92	5.25	3.32	Bobcat	16	F	A	9	6350.4	Mixed	Muscle
85	24-Dec-16	B16-057	-26.75	5.46	3.28	Bobcat	16	F	J	0	6350.4	Mixed	Muscle
86	10-Dec-16	B16-005	-24.45	6.04	3.22	Bobcat	16	M	J	0	4082.4	Mixed	Muscle
87	31-Jan-18	B17-129	-23.32	7.17	3.34	Bobcat	16	M	A	1	10262.7	Mixed	Liver
88	Jan 23rd, 2017	L16-033	-26.62306256	5.43	4.29	Lynx	16	M			11340	Mixed	Liver
89	18-Jan	L17-005	-27.23	4.19	3.35	Lynx	17	M	J	N/A	6889.05	Mixed	Muscle
90	20-Dec-16	B16-098	-26.59	5.43	3.25	Bobcat	17	M	A	1	10886.4	Mixed	Muscle
91	21-Dec-16	B16-092	-27.49	4.68	3.16	Bobcat	17	F	J	0	4536	Mixed	Muscle
92	August 3rd, 2016	L16-003	-25.92	3.94	3.24	Lynx	17	UNK			NA	Mixed	Muscle
93	4-Jan-17	B16-034	-27.1423332	4.46	3.81	Bobcat	17	M	J	0	6350.4	Mixed	Liver
94	18-Jan	L17-006	-27.01	4.28	3.23	Lynx	17	F	J	N/A	6038.55	Mixed	Muscle
95	18-Jan	L17-005	-26.95	5.03	3.35	Lynx	17	M	J	N/A	6889.05	Mixed	Liver
96	4-Jan-17	B16-034	-26.88	4.64	3.19	Bobcat	17	M	J	0	6350.4	Mixed	Muscle
97	18-Jan	L17-008	-26.62	5.21	3.25	Lynx	17	F	A	2.5	7994.7	Mixed	Liver
98	18-Jan	L17-008	-26.76	4.35	3.23	Lynx	17	F	A	2.5	7994.7	Mixed	Muscle
99	3-Jan-18	L17-021	-27.34	4.18	3.31	Lynx	17	F	A	2.5	9015.3	Mixed	Muscle
100	UNK	B17-153	-23.76	6.14	3.24	Bobcat	17	F	A	6	6463.8	Mixed	Liver
101	Jan 19th, 2017	L16-036	-26.39578397	6	3.98	Lynx	17	M			9979.2	Mixed	Liver
102	20-Dec-16	B16-098	-27.2387374	4.79	3.48	Bobcat	17	M	A	1	10886.4	Mixed	Liver
103	18-Jan	L17-006	-26.74	4.86	3.33	Lynx	17	F	J	N/A	6038.55	Mixed	Liver
104	21-Dec-16	B16-092	-27.30578397	4.93	3.98	Bobcat	17	F	J	0	4536	Mixed	Liver
105	Jan 19th, 2017	L16-036	-26.29	4.98	3.22	Lynx	17	M			9979.2	Mixed	Muscle
106	Feb 19th, 2017	L16-035	-26.98	4.3	3.29	Lynx	17	M			9979.2	Mixed	Muscle
107	3-Jan-18	L17-021	-26.67	5.13	3.24	Lynx	17	F	A	2.5	9015.3	Mixed	Liver
108	UNK	B17-153	-24.83	5.66	3.2	Bobcat	17	F	A	6	6463.8	Mixed	Muscle
109	18-Jan	L17-007	-26.74	5.23	3.26	Lynx	17	F	A	1.5	7711.2	Mixed	Liver
110	Feb 19th, 2017	L16-035	-27.05442021	5.56	4.01	Lynx	17	M			9979.2	Mixed	Liver
111	August 5th, 2016	L16-005	-26.19	4.78	3.28	Lynx	17	M			NA	Mixed	Muscle
112	18-Jan	L17-007	-27.22	4.46	3.35	Lynx	17	F	A	1.5	7711.2	Mixed	Muscle
113	Nov 28th, 2016	L16-008	-27.34	3.93	3.44	Lynx	18	M			10886.4	Mixed	Muscle
114	?	B16-016	-26.61	5.5	3.27	Bobcat	18	M	A	2	14061.6	Mixed	Muscle
115	Nov 28th, 2016	L16-008	-26.72465187	4.85	4.37	Lynx	18	M			10886.4	Mixed	Liver
116	28-Dec-16	B16-031	-26.25628263	5.75	4.27	Bobcat	18	F	A	3	7711.2	Mixed	Liver
117	28-Dec-17	B17-076	-25.49	5.77	3.28	Bobcat	18	M	A	1	8618.4	Mixed	Muscle
118	28-Dec-16	B16-031	-26.73	4.45	3.2	Bobcat	18	F	A	3	7711.2	Mixed	Muscle
119	15-Jan-18	B17-203	-27.5	4.84	3.25	Bobcat	18	M	J	N/A	4167.45	Mixed	Muscle
120	10-Dec-16	B16-069	-27.26967564	5.99	4.11	Bobcat	18	M	J	0	3175.2	Mixed	Liver
121	?	B16-016	-26.14802708	5.8	6.05	Bobcat	18	M	A	2	14061.6	Mixed	Liver
122	10-Dec-16	B16-069	-27.71	5.57	3.3	Bobcat	18	M	J	0	3175.2	Mixed	Muscle
123	28-Dec-17	B17-076	-25.09	5.98	3.17	Bobcat	18	M	A	1	8618.4	Mixed	Liver
124	18-Jan-18	B17-172	-25.73	4.95	3.37	Bobcat	18	F	A	4	8249.85	Mixed	Muscle
125	18-Jan-18	B17-172	-25.69	5.23	3.38	Bobcat	18	F	A	4	8249.85	Mixed	Liver
126	15-Jan-18	B17-203	-26.58	4.83	3.28	Bobcat	18	M	J	N/A	4167.45	Mixed	Liver
127	28-Feb-18	L17-039	-26.83	3.96	3.37	Lynx	18	M	A	2.5	10177.65	Mixed	Liver
128	28-Feb-18	L17-039	-26.81	3.31	3.29	Lynx	18	M	A	2.5	10177.65	Mixed	Muscle
129	19-Jan-18	B17-224	-25.55	6.15	3.62	Bobcat	19	M	J	0	6463.8	Bobcat	Liver
130	19-Nov-17	B17-150	-26.75	5.49	3.16	Bobcat	19	F	A	2	6974.1	Bobcat	Muscle
131	19-Jan-18	B17-224	-26.56	5.34	3.37	Bobcat	19	M	J	0	6463.8	Bobcat	Muscle
132	9-Jan-18	B17-080	-25.77	5.66	3.12	Bobcat	19	M	A	1	10432.8	Bobcat	Muscle
133	19-Nov-17	B17-150	-26.05	6.86	3.34	Bobcat	19	F	A	2	6974.1	Bobcat	Liver
134	22-Nov-16	B16-112	-27	4.65	3.19	Bobcat	19	F	A	1	7711.2	Bobcat	Muscle
135	22-Nov-16	B16-112	-27.28939901	4.95	3.61	Bobcat	19	F	A	1	7711.2	Bobcat	Liver
136	9-Jan-18	B17-080	-24.55	7.22	3.29	Bobcat	19	M	A	1	10432.8	Bobcat	Liver
137	9-Jun-17	L17-025	-25.42	5.9	4.13	Lynx	2	F	A	1.5	6435.45	Lynx	Liver
138	31-Dec-17	L17-011	-26.38	6.83	3.17	Lynx	2	M	A	1.5	7994.7	Lynx	Liver
139	9-Jun-17	L17-025	-25.7	4.36	3.2	Lynx	2	F	A	1.5	6435.45	Lynx	Muscle
140	31-Dec-17	L17-010	-26.52	6.14	3.25	Lynx	2	M	A	3.5	9809.1	Lynx	Liver
141	31-Dec-17	L17-011	-26.68	5.82	3.39	Lynx	2	M	A	1.5	7994.7	Lynx	Muscle
142	31-Dec-17	L17-010	-26.74	5.64	3.3	Lynx	2	M	A	3.5	9809.1	Lynx	Muscle
143	22-Feb-18	L17-015	-26.42	4.65	3.36	Lynx	20	M	A	1.5	11821.95	Mixed	Liver
144	9-Feb-18	L17-014	-26.43	4.18	3.75	Lynx	20	F	A	3.5	9128.7	Mixed	Liver
145	9-Feb-18	L17-014	-26.25	3.85	3.33	Lynx	20	F	A	3.5	9128.7	Mixed	Muscle
146	4-Jan-17	B16-022	-24.83	6.6	3.26	Bobcat	20	M	A	1	11793.6	Mixed	Muscle
147	16-Dec-16	B16-021	-26.59476065	5.63	4.05	Bobcat	20	F	A	6	7711.2	Mixed	Liver
148	16-Dec-16	B16-021	-26.03	5.21	3.1	Bobcat	20	F	A	6	7711.2	Mixed	Muscle
149	22-Dec-16	B16-090	-26.6	6.18	3.23	Bobcat	20	F	J	0	3175.2	Mixed	Muscle
150	9-Nov-17	L17-016	-26.14	3.64	3.18	Lynx	20	M	A	5.5	10489.5	Mixed	Muscle
151	20-Nov-17	B17-052	-26.66	5.38	3.35	Bobcat	20	M	J	N/A	5896.8	Mixed	Liver
152	2-Jan-18	B17-072	-25.24	4.63	3.26	Bobcat	20	F	A	4	7711.2	Mixed	Liver
153	22-Feb-18	L17-015	-26.35	3.29	3.23	Lynx	20	M	A	1.5	11821.95	Mixed	Muscle
154	11-Feb-18	L17-040	-26.7	3.9	3.28	Lynx	20	M	A	3.5	12814.2	Mixed	Muscle
155	4-Jan-17	B16-022	-23.99984085	7.93	4.79	Bobcat	20	M	A	1	11793.6	Mixed	Liver
156	2-Jan-18	B17-072	-25.32	4.54	3.38	Bobcat	20	F	A	4	7711.2	Mixed	Muscle
157	22-Dec-16	B16-090	-26.67471763	5.98	4	Bobcat	20	F	J	0	3175.2	Mixed	Liver
158	2-Dec-17	B17-053	-25.42	5.07	3.37	Bobcat	20	M	A	2	8618.4	Mixed	Muscle
159	2-Dec-17	B17-053	-24.69	5.68	3.28	Bobcat	20	M	A	2	8618.4	Mixed	Liver
160	11-Feb-18	L17-040	-26.3	5.13	3.43	Lynx	20	M	A	3.5	12814.2	Mixed	Liver
161	9-Nov-17	L17-016	-25.25	4.78	3.18	Lynx	20	M	A	5.5	10489.5	Mixed	Liver
162	17-Dec	L17-030	-26.57	4.57	3.3	Lynx	20	F	A	3.5	8221.5	Mixed	Muscle
163	17-Dec	L17-030	-26.46	5.56	3.37	Lynx	20	F	A	3.5	8221.5	Mixed	Liver
164	20-Nov-17	B17-052	-26.73	4.99	3.38	Bobcat	20	M	J	N/A	5896.8	Mixed	Muscle
165	10-Jan-17	B16-105	-26.18	5.78	3.43	Bobcat	21	F	J	0	4989.6	Mixed	Muscle
166	13-Jan-18	B17-102	-24.62	6.85	3.63	Bobcat	21	M	A	10	10999.8	Mixed	Muscle
167	30-Dec-17	B17-093	-26.74	4.96	3.29	Bobcat	21	M	J	N/A	4989.6	Mixed	Muscle
168	27-Nov-16	B16-001	-26.32362178	7.46	4.39	Bobcat	21	M	A	1	13154.4	Mixed	Liver
169	Nov 29th, 2016	L16-007	-26.41297085	6.48	4.45	Lynx	21	M			10886.4	Mixed	Liver
170	30-Dec-17	B17-093	-25.89	5.63	3.32	Bobcat	21	M	J	N/A	4989.6	Mixed	Liver
171	9-Dec-17	B17-051	-25.31	4.67	3.21	Bobcat	21	F	A	1	6804	Mixed	Muscle
172	Nov 29th, 2016	L16-007	-26.74	4.86	3.29	Lynx	21	M			10886.4	Mixed	Muscle
173	13-Jan-18	B17-102	-24.05	7.06	3.32	Bobcat	21	M	A	10	10999.8	Mixed	Liver
174	Jan 5th, 2017	L16-014	-26.56445548	5.96	4.62	Lynx	21	M			9979.2	Mixed	Liver
175	10-Jan-17	B16-105	-24.81061762	6.13	5.04	Bobcat	21	F	J	0	4989.6	Mixed	Liver
176	9-Dec-17	B17-051	-24.79	5.53	3.34	Bobcat	21	F	A	1	6804	Mixed	Liver
177	27-Nov-16	B16-001	-26.12	6.57	3.22	Bobcat	21	M	A	1	13154.4	Mixed	Muscle
178	Jan 5th, 2017	L16-014	-26.61	5.68	3.3	Lynx	21	M			9979.2	Mixed	Muscle
179	3-Dec-16	B16-020	-25.07746751	7.13	4.09	Bobcat	22	F	A	3	7711.2	Mixed	Liver
180	6-Jan-17	B16-083	-26.2587737	5.44	3.77	Bobcat	22	M	A	1	11793.6	Mixed	Liver
181	3-Jan-17	B16-040	-25.14	5.63	3.22	Bobcat	22	F	J	0	4536	Mixed	Muscle
182	15-Dec-17	B17-066	-25.68	7.53	3.29	Bobcat	22	M	A	5	12700.8	Mixed	Muscle
183	July 28th, 2016	L16-004	-26.21	3.95	3.29	Lynx	22	F			NA	Mixed	Muscle
184	30-Dec-17	B17-087	-25.23	6.5	3.36	Bobcat	22	F	A	3	6804	Mixed	Muscle
185	30-Dec-17	B17-087	-25.16	7.13	3.29	Bobcat	22	F	A	3	6804	Mixed	Liver
186	3-Dec-16	B16-020	-25.25	6.07	3.2	Bobcat	22	F	A	3	7711.2	Mixed	Muscle
187	3-Jan-17	B16-040	-23.44402114	6.79	4.14	Bobcat	22	F	J	0	4536	Mixed	Liver
188	22-Feb-18	B17-171	-22.04	6.8	3.32	Bobcat	22	M	J	N/A	6151.95	Mixed	Liver
189	15-Dec-17	B17-066	-25.02	8.77	3.3	Bobcat	22	M	A	5	12700.8	Mixed	Liver
190	22-Feb-18	B17-171	-23.14	5.73	3.15	Bobcat	22	M	J	N/A	6151.95	Mixed	Muscle
191	6-Jan-17	B16-083	-26.04	5.7	3.19	Bobcat	22	M	A	1	11793.6	Mixed	Muscle
192	7-Dec-17	B17-068	-26.19	5.38	3.23	Bobcat	23	F	A	4	8618.4	Bobcat	Muscle
193	21-Dec-17	B17-089	-24.62	7.58	3.26	Bobcat	23	M	A	3	11340	Bobcat	Liver
194	3-Dec-17	B17-083	-24.69	6.68	3.26	Bobcat	23	M	J	N/A	5443.2	Bobcat	Liver
195	7-Dec-17	B17-068	-26.26	5.87	3.35	Bobcat	23	F	A	4	8618.4	Bobcat	Liver
196	1-Jan-17	B16-028	-26.69	5.68	3.21	Bobcat	23	F	J	0	5443.2	Bobcat	Muscle
197	1-Jan-17	B16-028	-26.17207251	5.77	4.9	Bobcat	23	F	J	0	5443.2	Bobcat	Liver
198	3-Dec-17	B17-083	-25.67	6.01	3.09	Bobcat	23	M	J	N/A	5443.2	Bobcat	Muscle
199	21-Dec-17	B17-089	-25.98	6.22	3.46	Bobcat	23	M	A	3	11340	Bobcat	Muscle
200	15-Dec-16	B16-025	-25.59326575	6.36	5.54	Bobcat	23	M	A	1	12700.8	Bobcat	Liver
201	?	B16-102	-26.34	5.56	3.14	Bobcat	23	M	J	0	4082.4	Bobcat	Muscle
202	15-Dec-16	B16-025	-25.89	6.12	3.17	Bobcat	23	M	A	1	12700.8	Bobcat	Muscle
203	1-Jan-17	B16-104	-25.88	5.5	3.24	Bobcat	24	M	J	0	3628.8	Bobcat	Muscle
204	1-Jan-17	B16-104	-21.69343031	5.98	5.35	Bobcat	24	M	J	0	3628.8	Bobcat	Liver
205	28-Dec-16	B16-116	-26	6.19	3.56	Bobcat	24	M	A	2	12700.8	Bobcat	Muscle
206	5-Jan-18	B17-081	-23.56	8.21	3.23	Bobcat	24	M	A	5	13154.4	Bobcat	Liver
207	23-Jan-18	B17-124	-25.45	6.24	3.27	Bobcat	24	M	J	N/A	4649.4	Bobcat	Liver
208	18-Dec-17	B17-091	-25.07	7.56	3.23	Bobcat	24	F	A	1	8164.8	Bobcat	Liver
209	28-Dec-16	B16-116	-25.07517162	6.6	3.99	Bobcat	24	M	A	2	12700.8	Bobcat	Liver
210	5-Jan-18	B17-081	-24.49	6.68	3.13	Bobcat	24	M	A	5	13154.4	Bobcat	Muscle
211	23-Jan-18	B17-124	-26.57	3.78	3.21	Bobcat	24	M	J	N/A	4649.4	Bobcat	Muscle
212	18-Dec-17	B17-091	-25.6	6.45	3.22	Bobcat	24	F	A	1	8164.8	Bobcat	Muscle
213	1-Jan-18	B17-097	-26.02	6.01	3.22	Bobcat	25	M	A	1	9724.05	Bobcat	Liver
214	29-Dec-16	B16-087	-27.57614232	5.56	3.8	Bobcat	25	M	A	2	11340	Bobcat	Liver
215	29-Dec-16	B16-087	-26.3	5.96	3.11	Bobcat	25	M	A	2	11340	Bobcat	Muscle
216	1-Dec-17	B17-074	-26.73	6.72	3.2	Bobcat	25	M	J	N/A	5443.2	Bobcat	Muscle
217	14-Dec-17	B17-070	-26.19	6.2	3.22	Bobcat	25	F	A	3	8618.4	Bobcat	Liver
218	1-Jan-18	B17-097	-26.34	5.84	3.26	Bobcat	25	M	A	1	9724.05	Bobcat	Muscle
219	7-Dec-16	B16-042	-26.77465187	6.24	4.37	Bobcat	25	F	J	0	4536	Bobcat	Liver
220	7-Dec-16	B16-042	-26.74	6.16	3.25	Bobcat	25	F	J	0	4536	Bobcat	Muscle
221	1-Dec-16	B16-012	-26.3698545	6.03	3.94	Bobcat	25	M	A	0	6804	Bobcat	Liver
222	1-Dec-17	B17-074	-26	7.28	3.59	Bobcat	25	M	J	N/A	5443.2	Bobcat	Liver
223	14-Dec-17	B17-070	-26.86	4.73	3.13	Bobcat	25	F	A	3	8618.4	Bobcat	Muscle
224	Dec 28th, 2016	L16-016	-26.35	5.13	3.33	Lynx	3	F			9979.2	Lynx	Muscle
225	Nov 31st. 2016	L16-019	-26.62	5.63	3.35	Lynx	3	M			11793.6	Lynx	Muscle
226	Dec 9th, 2016	L16-015	-26.44	5.45	3.29	Lynx	3	F			8618.4	Lynx	Muscle
227	Dec 9th, 2016	L16-015	-26.64243227	6.48	4.83	Lynx	3	F			8618.4	Lynx	Liver
228	Nov 31st. 2016	L16-019	-26.01759457	6.47	4.86	Lynx	3	M			11793.6	Lynx	Liver
229	Dec 28th, 2016	L16-016	-25.68037272	6.04	5.18	Lynx	3	F			9979.2	Lynx	Liver
230	Dec 5th, 2016	L16-012	-26.21	6.04	3.33	Lynx	4	F			8618.4	Lynx	Muscle
231	Feb 2nd, 2017	L16-032	-19.00132833	6.77	5.53	Lynx	4	M			10432.8	Lynx	Liver
232	UNK	L17-034	-25.57	6.02	3.32	Lynx	4	M	A	2.5	8164.8	Lynx	Liver
233	Feb 2nd, 2017	L16-032	-24.4	5.41	3.32	Lynx	4	M			10432.8	Lynx	Muscle
234	Dec 5th, 2016	L16-012	-26.06573919	6.98	4.15	Lynx	4	F			8618.4	Lynx	Liver
235	UNK	L17-034	-26.31	5.27	3.27	Lynx	4	M	A	2.5	8164.8	Lynx	Muscle
236	Jan 7th, 2017	L16-037	-25.81139214	6.15	4.22	Lynx	5	M			10886.4	Lynx	Liver
237	Jan 7th, 2017	L16-037	-26.05	5.75	3.22	Lynx	5	M			10886.4	Lynx	Muscle
238	8-Dec-17	L17-037	-26.34	5.89	3.27	Lynx	5	M	A	3.5	11340	Lynx	Liver
239	29-Nov-14	L17-043	-25.58	5.68	3.33	Lynx	5	F	A	1.5	8079.75	Lynx	Liver
240	8-Dec-17	L17-037	-26.18	5.34	3.27	Lynx	5	M	A	3.5	11340	Lynx	Muscle
241	Jan 4th, 2017	L16-030	-26.12075225	7.26	4.84	Lynx	5	M			8164.8	Lynx	Liver
242	29-Nov-14	L17-043	-25.82	4.63	3.31	Lynx	5	F	A	1.5	8079.75	Lynx	Muscle
243	Feb 4th, 2016	L16-009	-26.52	4.26	3.26	Lynx	5	M			8618.4	Lynx	Muscle
244	Jan 4th, 2017	L16-030	-25.94	6.29	3.24	Lynx	5	M			8164.8	Lynx	Muscle
245	Feb 4th, 2016	L16-009	-25.87798159	5.39	4.33	Lynx	5	M			8618.4	Lynx	Liver
246	18-Dec-17	L17-012	-25.14	7.15	3.23	Lynx	5	F	A	3.5	5301.45	Lynx	Liver
247	18-Dec-17	L17-012	-26.08	5.31	3.33	Lynx	5	F	A	3.5	5301.45	Lynx	Muscle
248	16-Dec	L16-029	-26.27	4.74	3.2	Lynx	5	M			9525.6	Lynx	Muscle
249	16-Dec	L16-029	-26.59578397	6.44	3.98	Lynx	5	M			9525.6	Lynx	Liver
250	Dec 20th, 2016	L16-017	-26.29	5.52	3.38	Lynx	6	M			9979.2	Lynx	Muscle
251	9-Jan-18	L17-024	-26.52	5.17	3.24	Lynx	7	F	A	1.5	8901.9	Lynx	Liver
252	9-Jan-18	L17-026	-26.92	4.86	3.39	Lynx	7	F	A	3.5	10517.85	Lynx	Muscle
253	Dec 6th, 2016	L16-011	-26.34015044	6.8	3.79	Lynx	7	F		J	5896.8	Lynx	Liver
254	30-Nov-17	L17-013	-26.3	5.48	3.27	Lynx	7	M	A	2.5	10149.3	Lynx	Muscle
255	Jan 19th, 2017	L16-025	-27.37	4.99	3.23	Lynx	7	F		J	4082.4	Lynx	Muscle
256	Jan 19th, 2017	L16-025	-27.00655655	6.46	3.97	Lynx	7	F		J	4082.4	Lynx	Liver
257	Dec 6th, 2016	L16-011	-25.97	5.11	3.11	Lynx	7	F		J	5896.8	Lynx	Muscle
258	30-Nov-17	L17-013	-26.11	6.38	3.42	Lynx	7	M	A	2.5	10149.3	Lynx	Liver
259	19-Jan-18	L17-023	-26.29	5.53	3.46	Lynx	7	M	A	1.5	10546.2	Lynx	Liver
260	19-Jan-18	L17-023	-26.76	4.55	3.36	Lynx	7	M	A	1.5	10546.2	Lynx	Muscle
261	9-Jan-18	L17-026	-26.41	5.83	3.23	Lynx	7	F	A	3.5	10517.85	Lynx	Liver
262	UNK	L17-038	-26.93	5.36	3.26	Lynx	8	M	A	2.5	10432.8	Mixed	Liver
263	Nov 28th, 2016	L16-010	-26.4534318	6.24	6.17	Lynx	8	M			12247.2	Mixed	Liver
264	7-Dec-17	L17-003	-26.47	6.35	3.22	Lynx	8	F	A	5.5	7711.2	Mixed	Liver
265	UNK	L17-038	-27.16	4.66	3.4	Lynx	8	M	A	2.5	10432.8	Mixed	Muscle
266	18-Jan	L17-036	-27.31	5.95	3.55	Lynx	8	M	A	1.5	9922.5	Mixed	Liver
267	Dec 24th, 2016	L16-026	-27.62961498	6.2	4.28	Lynx	8	F			8618.4	Mixed	Liver
268	7-Dec-17	L17-003	-27.27	5.04	3.22	Lynx	8	F	A	5.5	7711.2	Mixed	Muscle
269	UNK	B17-281	-25.04	6.4	3.25	Bobcat	8	M	A	2	12417.3	Mixed	Muscle
270	May 11th, 2016	L16-024	-26.25449079	5.33	4.49	Lynx	8	F			9979.2	Mixed	Liver
271	1-Nov-14	L17-042	-26.39	4.36	3.42	Lynx	8	M	A	8.5	10659.6	Mixed	Muscle
272	Dec 20th, 2016	L16-028	-26.61	4.64	3.2	Lynx	8	M			11793.6	Mixed	Muscle
273	24-Jan-18	L17-020	-26.09	5.01	3.23	Lynx	8	M	A	1.5	5868.45	Mixed	Muscle
274	Nov 28th, 2016	L16-010	-26.65	5.18	3.37	Lynx	8	M			12247.2	Mixed	Muscle
275	1-Nov-14	L17-042	-26.26	5.66	3.49	Lynx	8	M	A	8.5	10659.6	Mixed	Liver
276	UNK	L17-041	-26.82	6.39	3.49	Lynx	8	M	A	3.5	11368.35	Mixed	Liver
277	18-Jan	L17-036	-27.03	4.92	3.37	Lynx	8	M	A	1.5	9922.5	Mixed	Muscle
278	Dec 24th, 2016	L16-026	-27.14	4.81	3.14	Lynx	8	F			8618.4	Mixed	Muscle
279	Feb 2nd, 2017	L16-027	-26.36610227	4.93	4.35	Lynx	8	M			10886.4	Mixed	Liver
280	Dec 20th, 2016	L16-028	-27.04655655	5.77	3.97	Lynx	8	M			11793.6	Mixed	Liver
281	24-Jan-18	L17-020	-24.79	6.49	3.17	Lynx	8	M	A	1.5	5868.45	Mixed	Liver
282	May 11th, 2016	L16-024	-26.58	3.49	3.21	Lynx	8	F			9979.2	Mixed	Muscle
283	Feb 2nd, 2017	L16-027	-26.87	4.73	3.33	Lynx	8	M			10886.4	Mixed	Muscle
284	Jan 10th, 2017	L16-021	-27.24961498	5.78	4.28	Lynx	8	F			7711.2	Mixed	Liver
285	Jan 10th, 2017	L16-021	-27.25	5.27	3.32	Lynx	8	F			7711.2	Mixed	Muscle
286	UNK	L17-041	-26.65	5.42	3.34	Lynx	8	M	A	3.5	11368.35	Mixed	Muscle
287	28-Apr-17	L17-022	-26.18	3.73	3.32	Lynx	9	M	A	2.5	9298.8	Lynx	Muscle
	29-Aug-19	18DE 001	-25.93	5.09	3.45	Deer	2	Female					Muscle
	29-Aug-19	18DE 002	-24.98	4.27	3.13	Deer	2	Male					Muscle
	29-Aug-19	18DE 003	-27.26	5.42	3.44	Deer	10						Muscle
	29-Aug-19	18DE 004	-26.88	4.44	3.32	Deer	6	Male					Muscle
	29-Aug-19	18DE 005	-26.51	5.46	3.34	Deer	11	Female					Muscle
	29-Aug-19	18DE 006	-27.21	4.77	3.36	Deer	10	Female					Muscle
	29-Aug-19	18DE 007	-27.15	4.3	3.46	Deer	6	Male					Muscle
	29-Aug-19	18DE 008	-26.13	4.63	3.33	Deer	6	Female					Muscle
	29-Aug-19	18DE 009	-26.65	3.89	3.39	Deer	6						Muscle
	29-Aug-19	18DE 010	-27.14	4.48	3.35	Deer	10						Muscle
	29-Aug-19	18DE 011	-26.09	4.51	3.34	Deer	2	Female					Muscle
	29-Aug-19	18DE 012	-24.61	3.58	3.39	Deer	2	Female					Muscle
	29-Aug-19	18DE 013	-27.29	4.38	3.59	Deer	1	Male					Muscle
	29-Aug-19	18DE 014	-26.36	3.71	3.35	Deer	1	Female					Muscle
	29-Aug-19	18DE 015	-26.45	4.35	3.3	Deer	2	Female					Muscle
	29-Aug-19	18DE 016	-26.52	3.15	3.31	Deer	2	Male					Muscle
	29-Aug-19	18DE 017	-26.64	2.96	3.34	Deer	2	Female					Muscle
	29-Aug-19	18DE 018	-24.82	3.43	3.3	Deer	2	Female					Muscle
	29-Aug-19	18DE 019	-26.51	3.72	3.32	Deer	16						Muscle
	29-Aug-19	18DE 020	-26.86	4.58	3.26	Deer	16	Female					Muscle
	29-Aug-19	18DE 021	-26.78	8.49	3.58	Deer	16						Muscle
	29-Aug-19	18DE 022	-26.52	5.62	3.32	Deer	16	Male					Muscle
	29-Aug-19	18DE 023	-25.93	5.82	3.28	Deer	16						Muscle
	29-Aug-19	18DE 024	-26.2	5.53	3.42	Deer	16	Female					Muscle
	29-Aug-19	18DE 025	-26.96	2.27	3.29	Deer	21						Muscle
	29-Aug-19	18DE 026	-26.45	3.07	3.26	Deer	21	Female					Muscle
	29-Aug-19	18DE 027	-26.63	3.26	3.25	Deer	21	Male					Muscle
	29-Aug-19	18DE 028	-26.91	5.59	3.23	Deer	21						Muscle
	29-Aug-19	18DE 029	-25.71	4.49	3.32	Deer	21	Female					Muscle
	29-Aug-19	18DE 030	-25.43	4.67	3.22	Deer	23						Muscle
	29-Aug-19	18DE 031	-26	4.58	3.17	Deer	23						Muscle
	29-Aug-19	18DE 032	-25.69	4.65	3.25	Deer	23						Muscle
	29-Aug-19	18DE 033	-26.55	5.72	3.27	Deer	23						Muscle
	29-Aug-19	18DE 034	-25.82	3.11	3.25	Deer	23						Muscle
	4-Sep-19	18DE 049	-27.35	4.61	3.26	Deer	25	Male					Muscle
	4-Sep-19	18DE 050	-27.34	4.42	3.24	Deer	25	Male					Muscle
	4-Sep-19	18DE 051	-26.31	5.88	3.36	Deer	25	Male					Muscle
	4-Sep-19	18DE 052	-27.26	4.77	3.38	Deer	25	Male					Muscle
	4-Sep-19	18DE 053	-26.75	4.66	3.34	Deer	25	Female					Muscle
	4-Sep-19	18DE 054	-26.54	4.03	3.24	Deer	25	Female					Muscle
	4-Sep-19	18DE 055	-26.47	3.81	3.22	Deer	25	Male					Muscle
	4-Sep-19	18DE 056	-26.87	2.88	3.24	Deer	25	Male					Muscle
	4-Sep-19	18DE 057	-25.72	6.06	3.32	Deer	25						Muscle
	4-Sep-19	18DE 058	-26.57	4.47	3.24	Deer	25						Muscle
	4-Sep-19	18DE 059	-26	3.87	3.2	Deer	25						Muscle
	4-Sep-19	18DE 060	-26.87	3.57	3.17	Deer	25	Female					Muscle
	4-Sep-19	18DE 061	-26.66	4.06	3.26	Deer	25	Male					Muscle
	4-Sep-19	18DE 062	-27.38	4.74	3.24	Deer	25	Female					Muscle
	4-Sep-19	18DE 063	-26.53	4.65	3.2	Deer	25	Male					Muscle
	4-Sep-19	18DE 064	-26.77	4.49	3.22	Deer	25	Male					Muscle
	4-Sep-19	18DE 065	-26.41	3.99	3.22	Deer	25						Muscle
	4-Sep-19	18DE 066	-26.09	4.13	3.28	Deer	25						Muscle
	4-Sep-19	18DE 067	-25.7	3.31	3.21	Deer	25						Muscle
	4-Sep-19	18DE 068	-26.58	3.67	3.2	Deer	25						Muscle
	4-Sep-19	18DE 069	-26.76	5.53	3.23	Deer	22	Buck					Muscle
	4-Sep-19	18DE 070	-26.87	3.28	3.18	Deer	22						Muscle
	4-Sep-19	18DE 071	-25.74	4.26	3.17	Deer	22	Male					Muscle
	4-Sep-19	18DE 072	-27.47	3.4	3.86	Deer	22						Muscle
	4-Sep-19	18DE 073	-25.88	4.81	3.39	Deer	22						Muscle
	4-Sep-19	18DE 074	-25.74	4.86	3.19	Deer	7						Muscle
	4-Sep-19	18DE 075	-25.61	4.14	3.18	Deer	7						Muscle
	4-Sep-19	18DE 076	-26.22	4.06	3.32	Deer	7						Muscle
	4-Sep-19	18DE 077	-26.68	4.55	3.28	Deer	7						Muscle
	4-Sep-19	18DE 078	-25.44	5.63	3.26	Deer	7						Muscle
	4-Sep-19	18DE 079	-25.65	7.21	3.23	Deer	7						Muscle
	4-Sep-19	18DE 080	-26.04	3.8	3.19	Deer	7						Muscle
	4-Sep-19	18DE 081	-26.74	3.92	3.22	Deer	24	Male					Muscle
	4-Sep-19	18DE 082	-26.38	2.37	3.19	Deer	24	Female					Muscle
	3-Sep-19	18DE 085	-26.31	3.68	3.35	Deer	24	Female					Muscle
	3-Sep-19	18DE 086	-26.63	3.62	3.11	Deer	24						Muscle
	3-Sep-19	18DE 087	-25.95	4.89	3.11	Deer	18	Female					Muscle
	3-Sep-19	18DE 088	-25.16	7.14	3.03	Deer	12						Muscle
	3-Sep-19	18DE 089	-25.61	8.09	3.11	Deer	12						Muscle
	3-Sep-19	18DE 090	-26.82	5.69	3.16	Deer	12						Muscle
	3-Sep-19	18DE 091	-23.73	7.12	3.04	Deer	12						Muscle
	3-Sep-19	18DE 092	-24.03	7.11	3.12	Deer	12						Muscle
	3-Sep-19	18DE 093	-26.15	3.51	3.08	Deer	20	Female					Muscle
	3-Sep-19	18DE 094	-26.09	3.58	3.04	Deer	20	Male					Muscle
	3-Sep-19	18DE 095	-26.44	3.28	3.1	Deer	20	Male					Muscle
	3-Sep-19	18DE 096	-26.96	4.42	3.13	Deer	20	Female					Muscle
	3-Sep-19	18DE 097	-26.42	3.56	3.05	Deer	20	Female					Muscle
	3-Sep-19	18DE 098	-26.58	5.44	3.09	Deer	20	Male					Muscle
	3-Sep-19	18DE 099	-26.15	7.36	3.14	Deer	17						Muscle
	3-Sep-19	18DE 100	-25.81	7.8	3.08	Deer	17						Muscle
	3-Sep-19	18DE 101	-25.51	6.13	2.99	Deer	17						Muscle
	3-Sep-19	18DE 102	-25.89	6.01	3.1	Deer	13						Muscle
	3-Sep-19	18DE 103	-26.1	6.64	3.07	Deer	13						Muscle
	3-Sep-19	18DE 104	-25.82	6.6	2.98	Deer	13						Muscle
	3-Sep-19	18DE 105	-24.07	4.34	2.95	Deer	13						Muscle
	3-Sep-19	18DE 106	-27.78	6.96	5.43	Deer	13						Muscle
	3-Sep-19	18DE 107	-26.11	5.66	3.07	Deer	11						Muscle
	3-Sep-19	18DE 107	-26.11	5.66	3.07	Deer	19						Muscle
	3-Sep-19	18DE 108	-26.08	3.65	2.93	Deer	19	Female					Muscle
	3-Sep-19	18DE 109	-25.86	5.42	3	Deer	19						Muscle
	29-Aug-19	18MO 001	-26.08	2.12	3.2	Moose	1	Male					Muscle
	29-Aug-19	18MO 002	-26.3	1.71	3.26	Moose	1	Female					Muscle
	29-Aug-19	18MO 003	-25.76	3.03	3.08	Moose	2						Muscle
	29-Aug-19	18MO 004	-25.6	2.49	3.12	Moose	2	Male					Muscle
	29-Aug-19	18MO 005	-25.59	2.77	3.19	Moose	2	Female					Muscle
	29-Aug-19	18MO 006	-25.04	2.08	3.17	Moose	2	Female					Muscle
	29-Aug-19	18MO 007	-24.23	3.49	3.25	Moose	6	Male					Muscle
	29-Aug-19	18MO 008	-25.9	2.36	3.03	Moose	6	Female					Muscle
	29-Aug-19	18MO 009	-26.13	2.14	3.17	Moose	6	Male					Muscle
	29-Aug-19	18MO 010	-25.61	3.82	3.03	Moose	10	Female					Muscle
	29-Aug-19	18MO 011	-28.32	2.29	4.07	Moose	6	Female					Muscle
	29-Aug-19	18MO 012	-27.4	4.11	3.26	Moose	10	Male					Muscle
	29-Aug-19	18MO 013	-27.32	2.85	3.93	Moose	11	Male					Muscle
	29-Aug-19	18MO 014	-25.84	3.81	3.05	Moose	11	Male					Muscle
	29-Aug-19	18MO 015	-25.8	3.19	3.05	Moose	11	Female					Muscle
	29-Aug-19	18MO 016	-25.26	2.03	2.98	Moose	6	Female					Muscle
	29-Aug-19	18MO 017	-26.89	2.82	3.38	Moose	16						Muscle
	29-Aug-19	18MO 018	-26.83	2.56	3.02	Moose	16	Male					Muscle
	29-Aug-19	18MO 019	-25.68	3.09	2.97	Moose	16						Muscle
	29-Aug-19	18MO 020	-26.49	2.84	3.07	Moose	16	Female					Muscle
	29-Aug-19	18MO 021	-26.9	-0.05	3.11	Moose	16						Muscle
	29-Aug-19	18MO 022	-26.2	3.5	3.06	Moose	16						Muscle
	29-Aug-19	18MO 023	-25.75	2.66	2.98	Moose	16						Muscle
	29-Aug-19	18MO 024	-25.93	1.45	3.03	Moose	16						Muscle
	29-Aug-19	18MO 025	-26.45	1.8	3.06	Moose	16	Male					Muscle
	29-Aug-19	18MO 026	-26.36	1.73	2.96	Moose	16						Muscle
	29-Aug-19	18MO 027	-25.37	3.29	2.96	Moose	16						Muscle
	29-Aug-19	18MO 028	-26.57	1.44	3.01	Moose	16						Muscle
	29-Aug-19	18MO 029	-26.34	2.08	2.97	Moose	18						Muscle
	29-Aug-19	18MO 030	-25.95	1.55	3.05	Moose	18						Muscle
	29-Aug-19	18MO 031	-27.17	1.8	3.33	Moose	18	Bull					Muscle
	29-Aug-19	18MO 032	-26.2	-0.17	3.04	Moose	18	Bull					Muscle
	29-Aug-19	18MO 033	-26.16	1.63	2.92	Moose	18						Muscle
	29-Aug-19	18MO 034	-26.36	0.87	2.96	Moose	18						Muscle
	29-Aug-19	18MO 035	-26.63	1.05	3.06	Moose	18						Muscle
	4-Sep-19	18MO 085	-25.35	1.39	3.2	Moose	25	Female					Muscle
	4-Sep-19	18MO 086	-25.41	1.48	3.16	Moose	25	Male					Muscle
	4-Sep-19	18MO 087	-26	0.72	3.33	Moose	25	Female					Muscle
	4-Sep-19	18MO 088	-26.05	1.34	3.15	Moose	22	Cow					Muscle
	4-Sep-19	18MO 089	-25.94	0.49	3.13	Moose	22	Bull					Muscle
	4-Sep-19	18MO 090	-26.58	3.93	3.46	Moose	22						Muscle
	4-Sep-19	18MO 091	-26.81	0.99	3.21	Moose	22						Muscle
	4-Sep-19	18MO 092	-25.83	3.96	3.15	Moose	22						Muscle
	4-Sep-19	18MO 093	-25.88	1.97	3.16	Moose	22						Muscle
	4-Sep-19	18MO 094	-27.18	2.47	3.23	Moose	22						Muscle
	4-Sep-19	18MO 095	-25.74	1.95	3.22	Moose	7						Muscle
	4-Sep-19	18MO 096	-26.34	1.27	3.47	Moose	7						Muscle
	4-Sep-19	18MO 097	-27.24	1	3.94	Moose	7						Muscle
	4-Sep-19	18MO 098	-25.93	0.58	3.23	Moose	7						Muscle
	4-Sep-19	18MO 099	-26.67	0.85	3.46	Moose	7						Muscle
	4-Sep-19	18MO 100	-25.96	1.26	3.23	Moose	20	Female					Muscle
	4-Sep-19	18MO 101	-26.45	-0.34	3.53	Moose	20	Female					Muscle
	4-Sep-19	18MO 102	-25.95	2.79	3.19	Moose	20						Muscle
	4-Sep-19	18MO 103	-26.41	1.9	3.73	Moose	20	Male					Muscle
	4-Sep-19	18MO 104	-27.86	2.23	3.35	Moose	20	Female					Muscle
	4-Sep-19	18MO 105	-26.79	1.4	3.25	Moose	20	Female					Muscle
	4-Sep-19	18MO 106	-27.97	1.78	4.46	Moose	20	Male					Muscle
	4-Sep-19	18MO 107	-26.81	0.18	3.2	Moose	18	Female					Muscle
	3-Sep-19	18MO 108	-26.26	1.9	3.18	Moose	12						Muscle
	3-Sep-19	18MO 109	-25.94	2.98	3.13	Moose	12	Female					Muscle
	3-Sep-19	18MO 110	-25.91	3.46	3.27	Moose	12						Muscle
	3-Sep-19	18MO 111	-26.6	2.62	3.59	Moose	12						Muscle
	3-Sep-19	18MO 112	-25.84	1.08	3.1	Moose	12						Muscle
	3-Sep-19	18MO 113	-26.13	2.66	3.25	Moose	12						Muscle
	3-Sep-19	18MO 114	-25.84	4.91	3.04	Moose	13						Muscle
	3-Sep-19	18MO 115	-26.45	1.94	3.3	Moose	13						Muscle
	3-Sep-19	18MO 116	-26.92	2.14	3.57	Moose	13						Muscle
	3-Sep-19	18MO 117	-26.71	0.32	3.11	Moose	13						Muscle
	3-Sep-19	18MO 118	-26.84	1.4	3.37	Moose	13						Muscle
	3-Sep-19	18MO 119	-25.88	3.24	3.13	Moose	13						Muscle
	3-Sep-19	18MO 120	-25.9	0.66	3.18	Moose	19						Muscle
	3-Sep-19	18MO 121	-25.46	-0.01	3.08	Moose	19	Female					Muscle
	3-Sep-19	18MO 122	-27.24	2.22	3.46	Moose	19	Female					Muscle
	3-Sep-19	18MO 123	-26.41	1.18	3.06	Moose	19	Male					Muscle
	3-Sep-19	18MO 124	-25.46	0.03	3.09	Moose	19	Male					Muscle
	3-Sep-19	18MO 125	-26.25	1.67	3.11	Moose	19						Muscle
	3-Sep-19	18MO 126	-26.26	1.4	2.95	Moose	19	Male					Muscle
		RBV2	-29.85	6.26	8.83	Red_Backed_Vole							Muscle
		RBV3	-25.91	7.05	3.19	Red_Backed_Vole							Muscle
		RBV4	-27.15	5.43	4.65	Red_Backed_Vole							Muscle
		RBV5	-27.8	5.44	3.81	Red_Backed_Vole							Muscle
		RBV6	-27.58	6.92	5.04	Red_Backed_Vole							Muscle
		RBVI	-27.49	6.17	4.17	Red_Backed_Vole							Muscle
		RSQ1	-22.69	4.65	3.09	Red_Squirrel							Muscle
		RSQ2	-24.75	6.97	3.42	Red_Squirrel							Muscle
		RSQ3	-23.29	5.37	3.25	Red_Squirrel							Muscle
		RSQ4	-21.81	4.7	3.26	Red_Squirrel							Muscle
		RSQ5	-21.92	2.87	3.2	Red_Squirrel							Muscle
		RSQ6	-20.68	3.52	3.11	Red_Squirrel							Muscle
		RSQ7	-23.17	3.12	3.33	Red_Squirrel							Muscle
		SSH1	-28.77	1.74	3.37	Snow_Shoe_Hare							Muscle
		SSH2	-28.6	2.26	3.24	Snow_Shoe_Hare							Muscle
		SSH3	-28.32	1.44	3.19	Snow_Shoe_Hare							Muscle
		SSH4	-27.69	-1.49	3.02	Snow_Shoe_Hare							Muscle
		SSH5	-28.13	1.11	3.19	Snow_Shoe_Hare							Muscle
		SSH6	-28.23	2.21	3.13	Snow_Shoe_Hare							Muscle
		V01	-25.01	8.34	3.29	Meadow_Vole							Muscle
		V02	-29.72	7.31	5.28	Meadow_Vole							Muscle
		VO3	-27.21	4.56	3.34	Meadow_Vole							Muscle
		VO4	-28.24	4.1	3.46	Meadow_Vole							Muscle
		CH2	-23.37	1.94	3.23	Chipmunk							Muscle
		CHI	-23.44	2.81	3.05	Chipmunk							Muscle
		FSQ1	-23.51	7.46	3.29	Flying_Squirrel							Muscle
		FSQ2	-21.67	7.01	3.19	Flying_Squirrel							Muscle
		FSQ3	-22.71	5.33	3.28	Flying_Squirrel							Muscle
		FSQ4	-21.56	3.93	3.18	Flying_Squirrel							Muscle
		GSQ1	-24.59	4.8	3.06	Grey_Squirrel							Muscle
